# Supplementary material for: Coumarin Probe for Selective Detection of Fluoride Ions in Aqueous Solution and Its Bioimaging in Live Cells
Source: PubMed Central journal article supplement (PMC6069086; doi:10.3390/s18072042), 2018-06-26
Supplement: sensors-18-02042-s001.pdf [file sensors-18-02042-s001.pdf]

# Supporting Information

## Coumarin probe for selective detection of fluoride ion in aqueous solution and its bioimaging in live cells

Kantapat Chansaenpak,<sup>\*a</sup> Anyanee Kamkaew,<sup>b</sup> Oratai Weeranantanapan,<sup>c</sup> Khomson Suttisintong,<sup>a</sup> Gamolwan Tumcharern<sup>a</sup>

<sup>a</sup>National Nanotechnology Center, National Science and Technology Development Agency, Thailand Science Park, Pathum Thani, Thailand 12120.

<sup>b</sup>School of Chemistry, Institute of Science, Suranaree University of Technology, Nakhon Ratchasima, Thailand 30000

<sup>c</sup>School of Preclinical Science, Institute of Science, Suranaree University of Technology, Nakhon Ratchasima, Thailand 30000

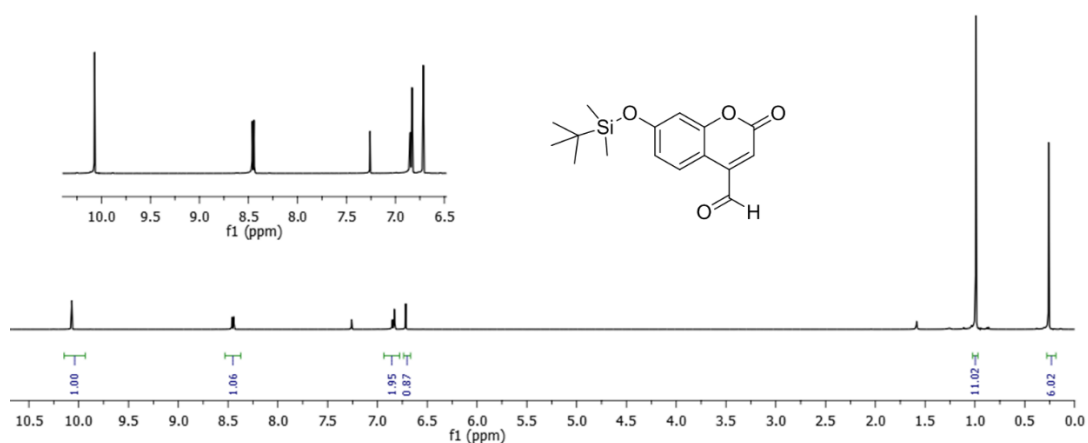

Figure S1. <sup>1</sup>H NMR spectrum of 2

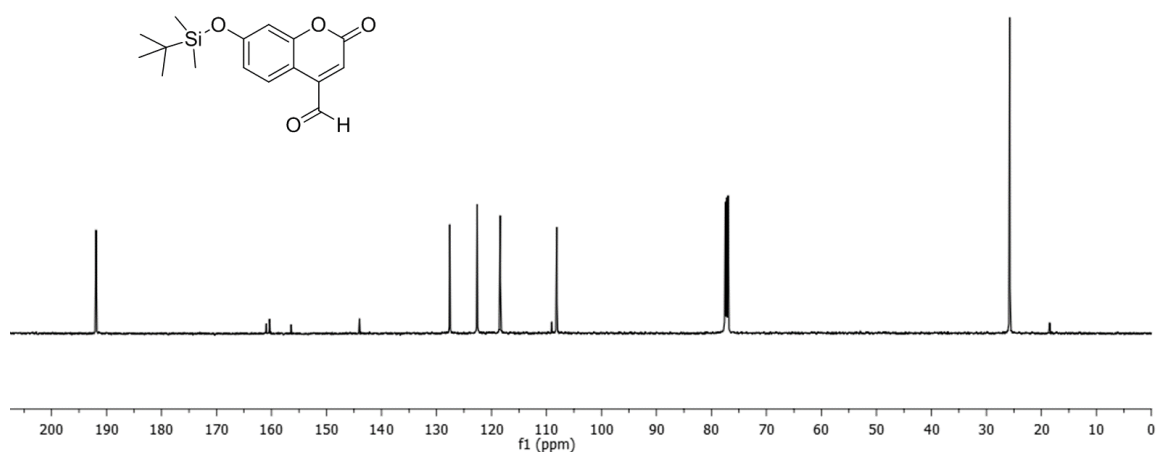

Figure S2. <sup>13</sup>C NMR spectrum of 2

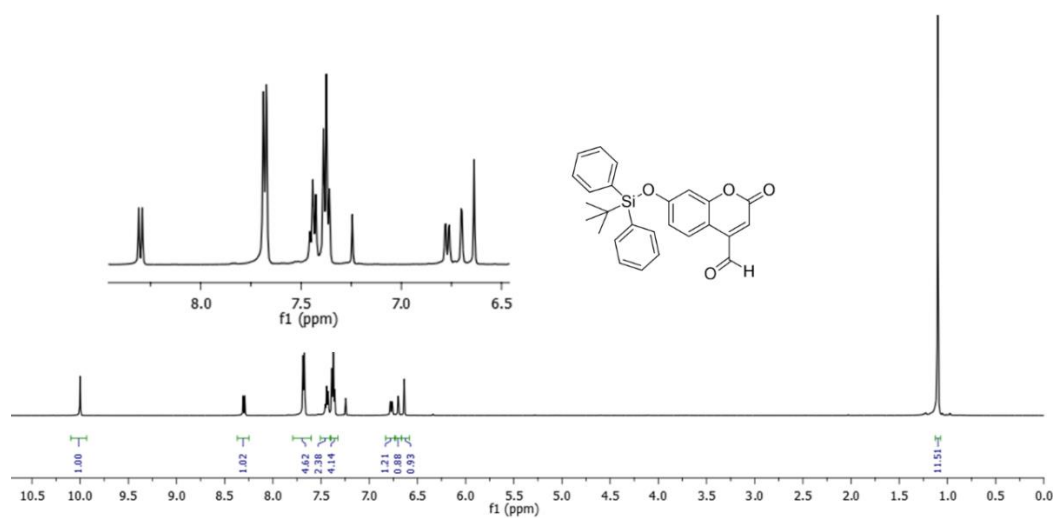

**Figure S3.  $^1\text{H}$  NMR spectrum of **3****

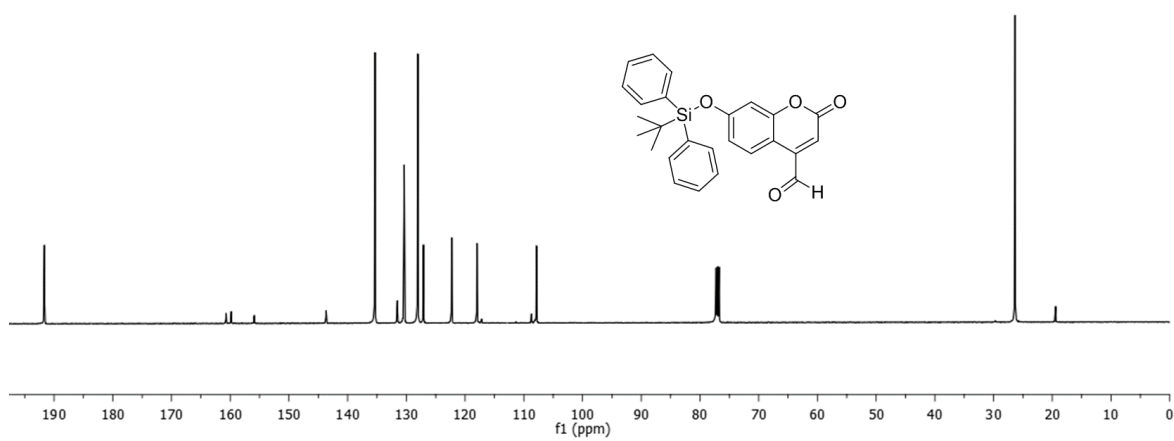

**Figure S4.  $^{13}\text{C}$  NMR spectrum of **3****

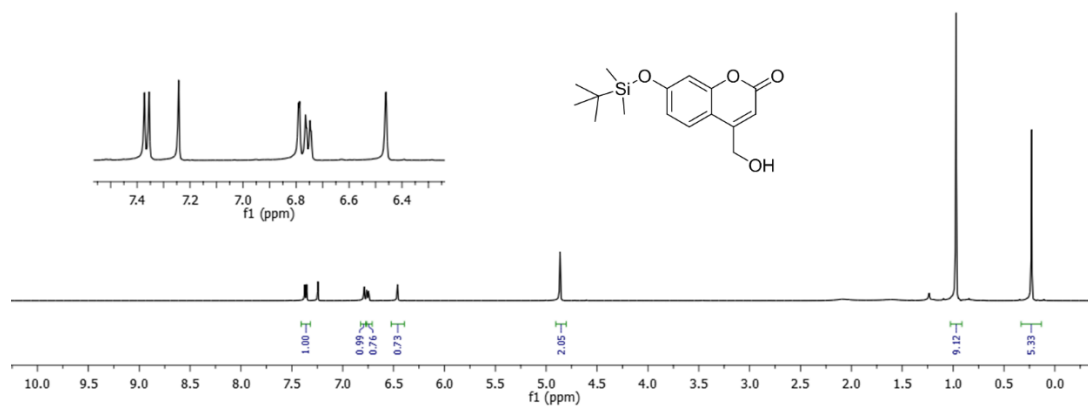

**Figure S5.** <sup>1</sup>H NMR spectrum of **4**

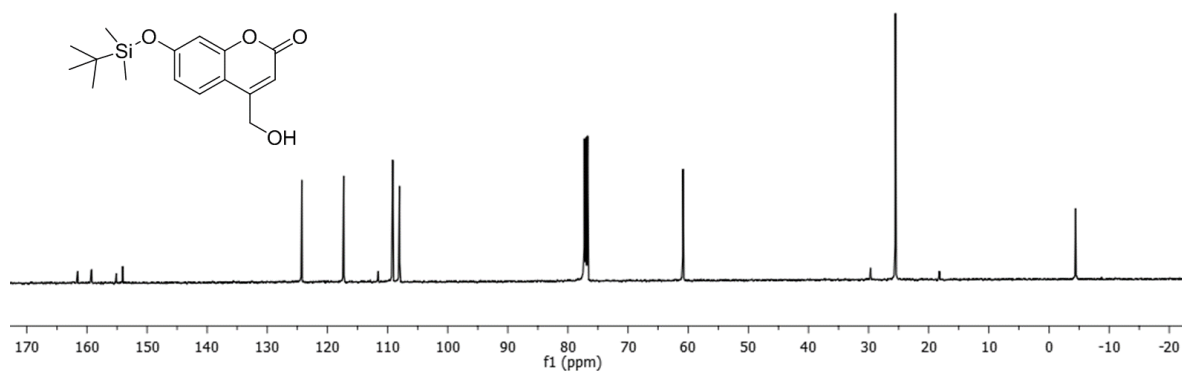

**Figure S6.** <sup>13</sup>C NMR spectrum of **4**

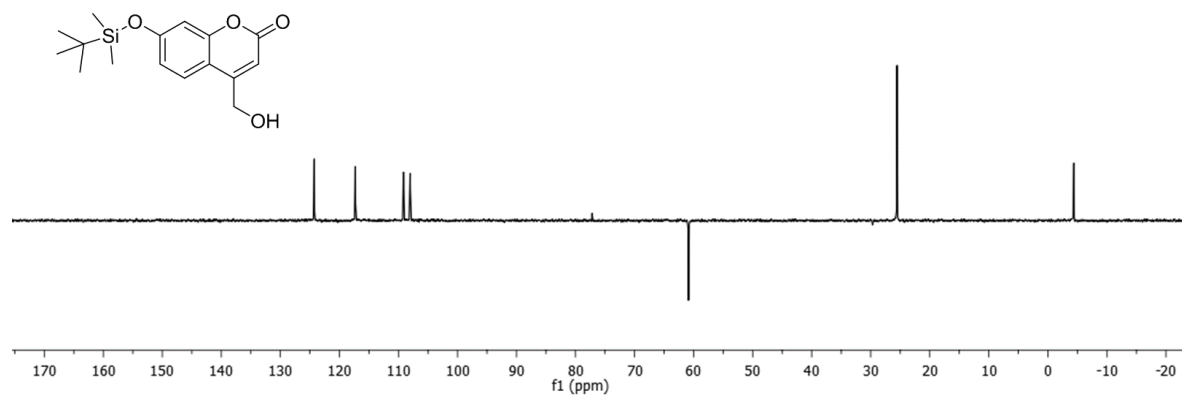

**Figure S7.** DEPT-135 spectrum of **4**

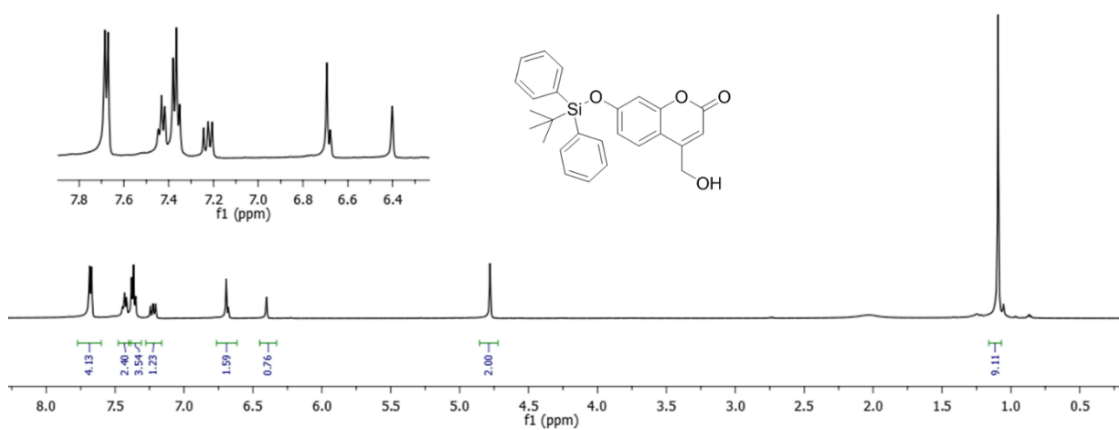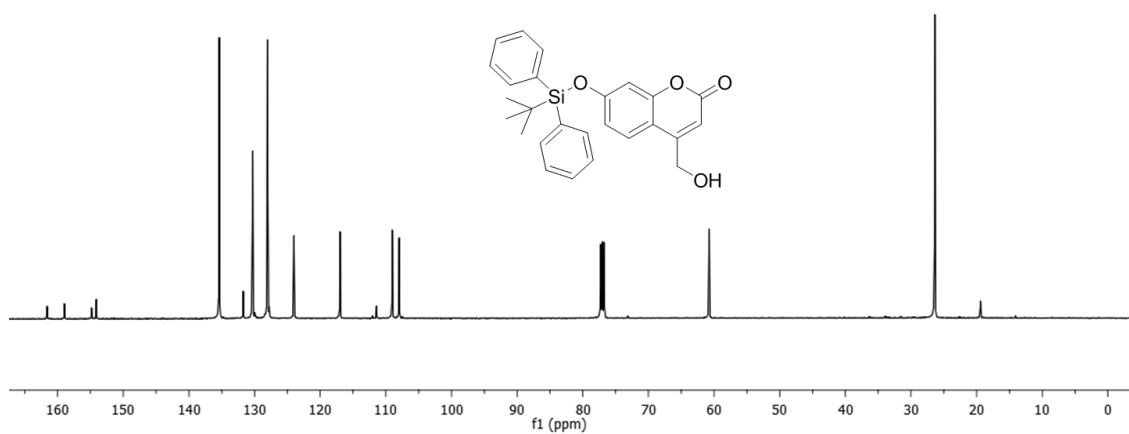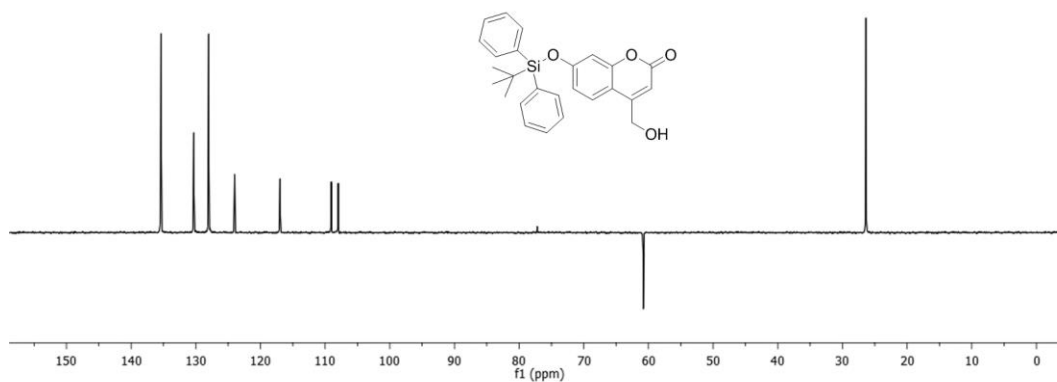

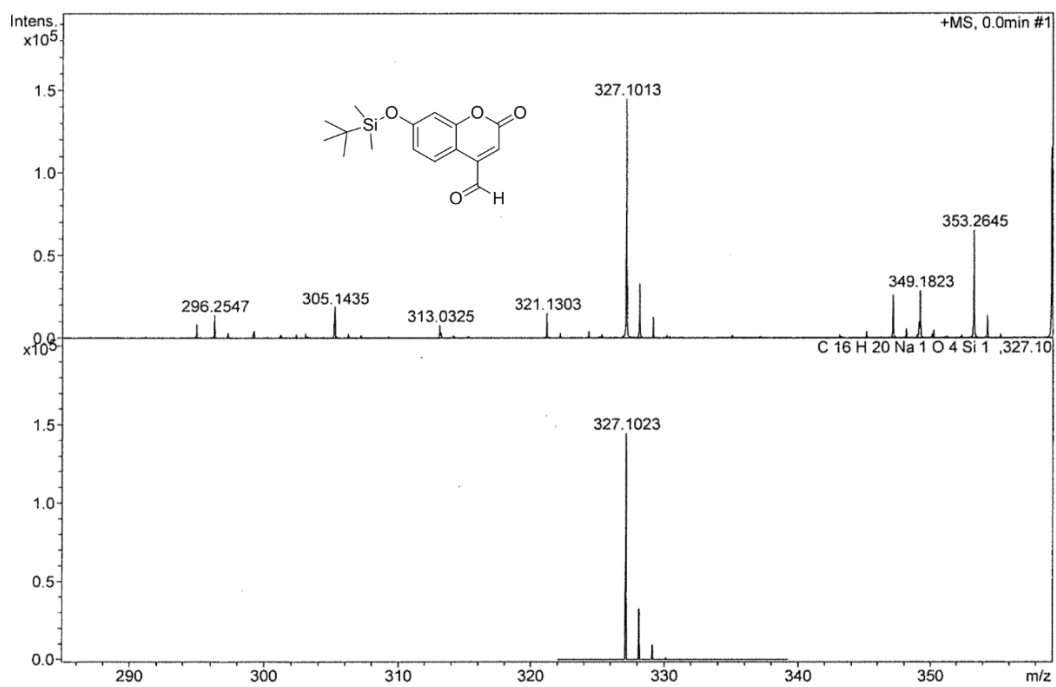

**Figure S11.** High resolution mass spectrum of **2**

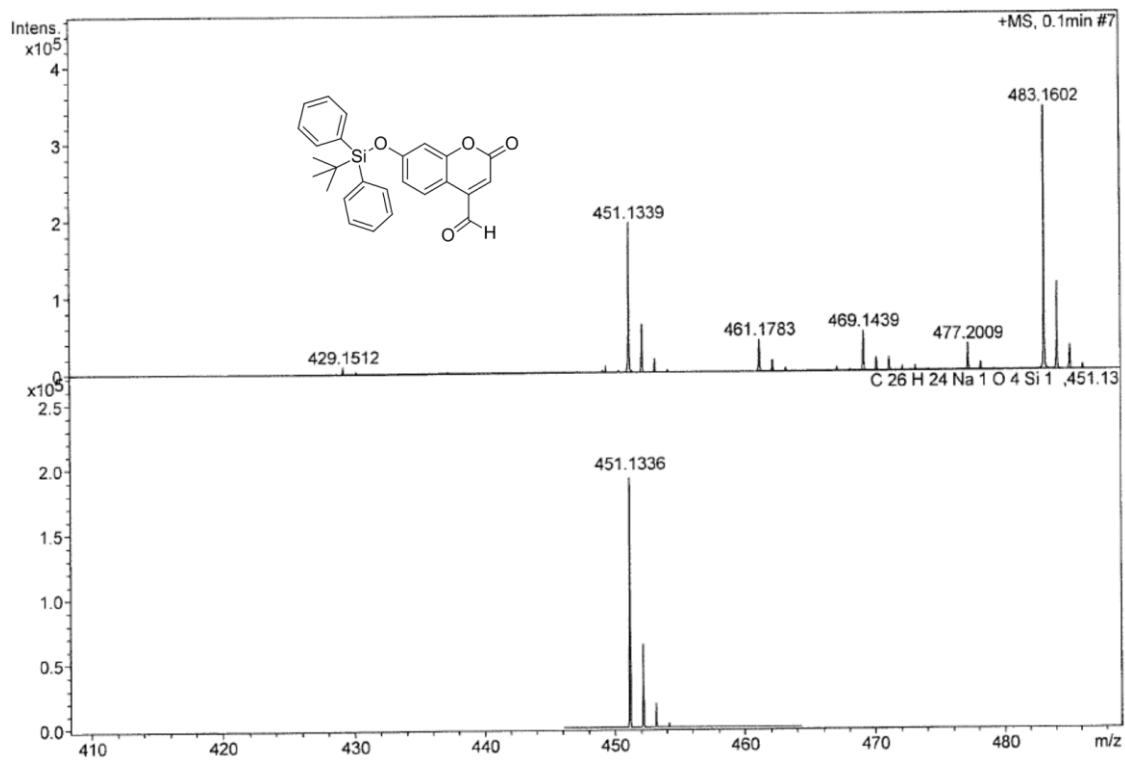

**Figure S12.** High resolution mass spectrum of **3**

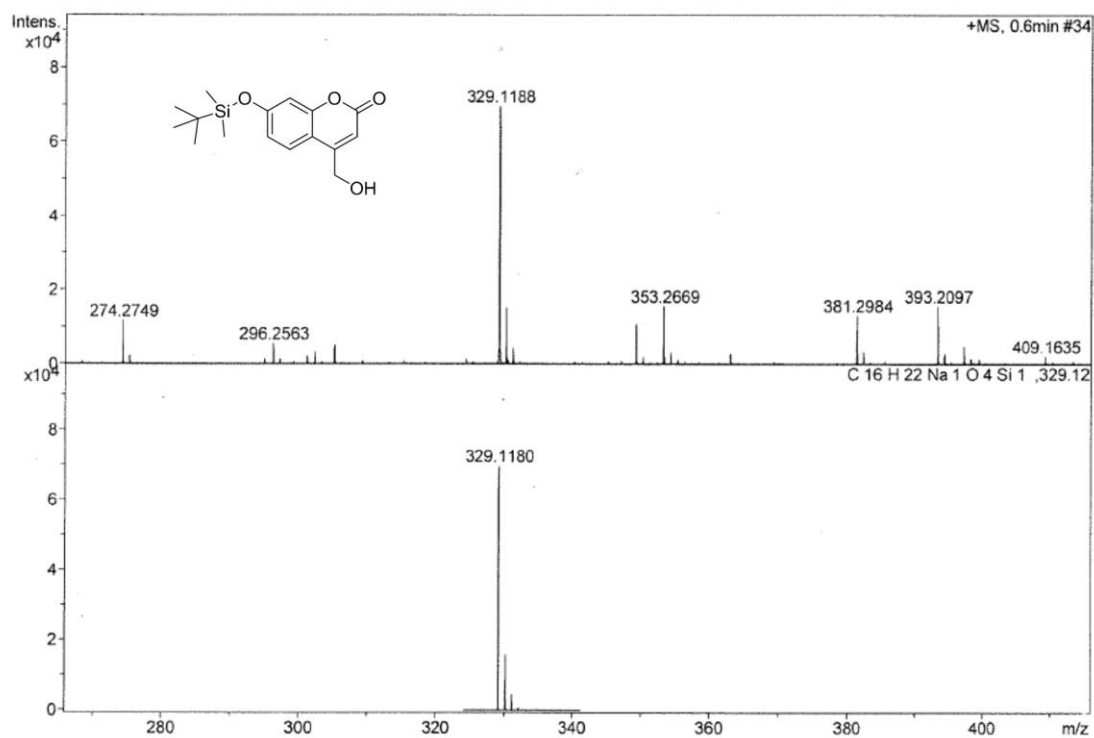

**Figure S13.** High resolution mass spectrum of **4**

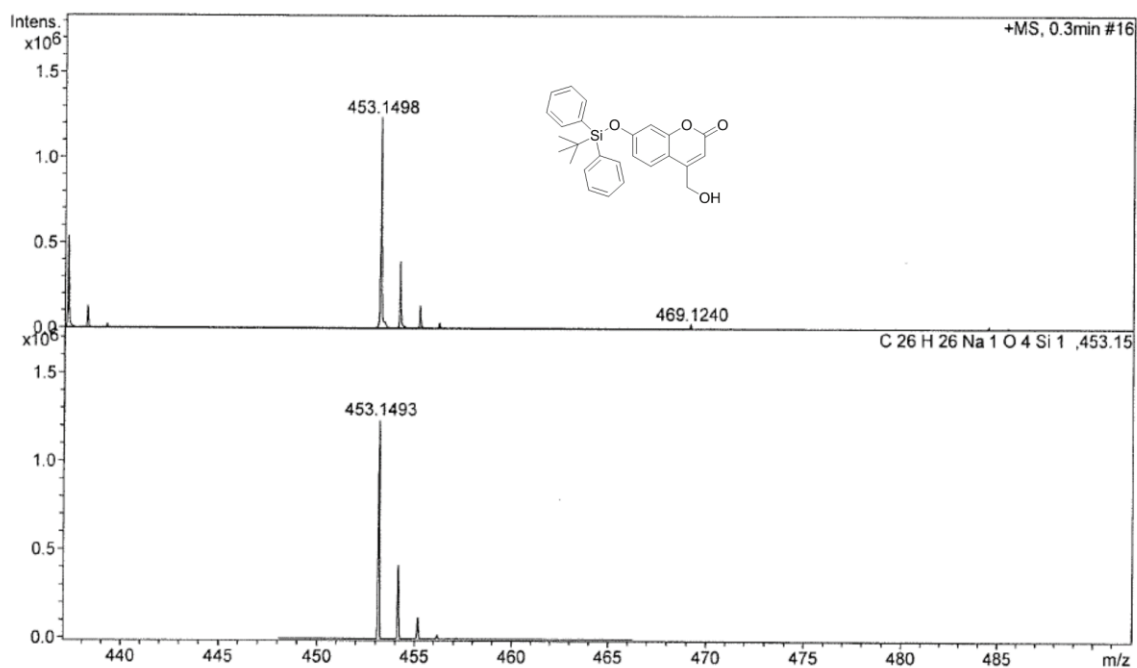

**Figure S14.** High resolution mass spectrum of **5**

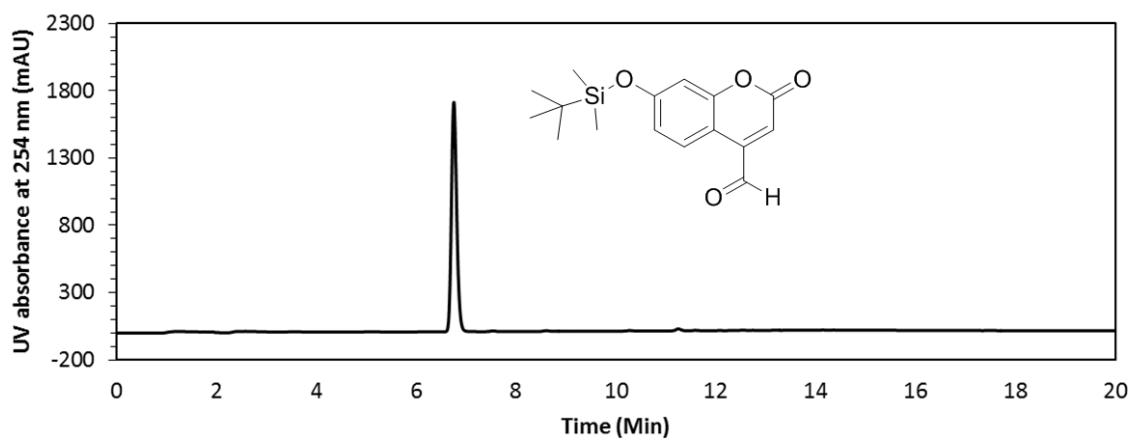

**Figure S15.** UV-HPLC profile of **2**

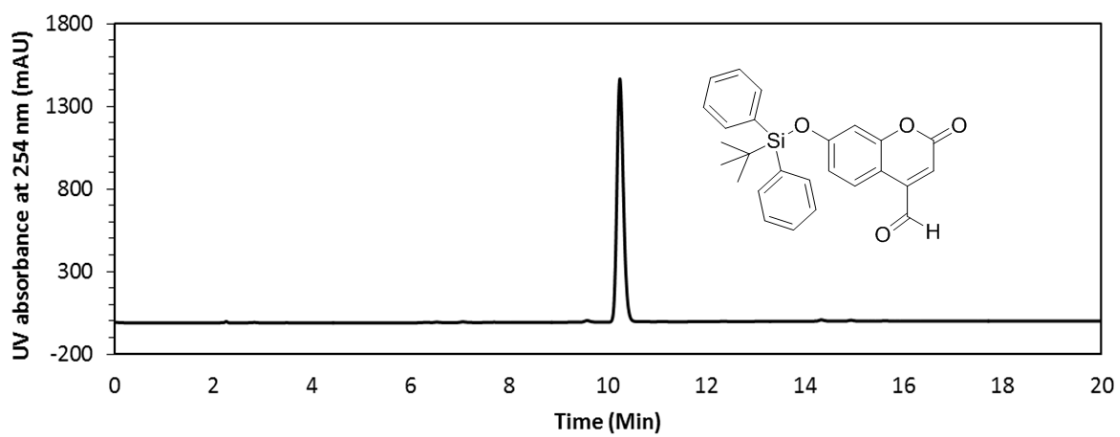

**Figure S16.** UV-HPLC profile of **3**

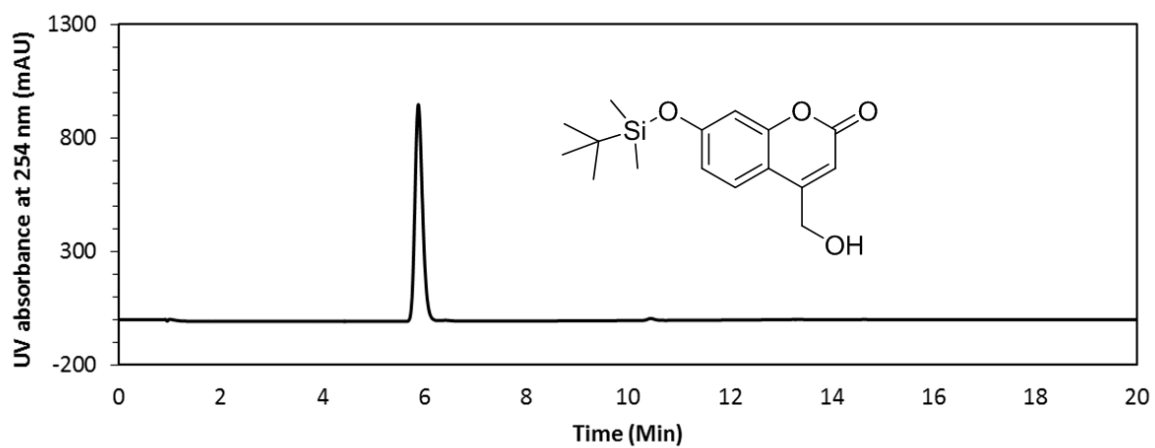

**Figure S17.** UV-HPLC profile of **4**

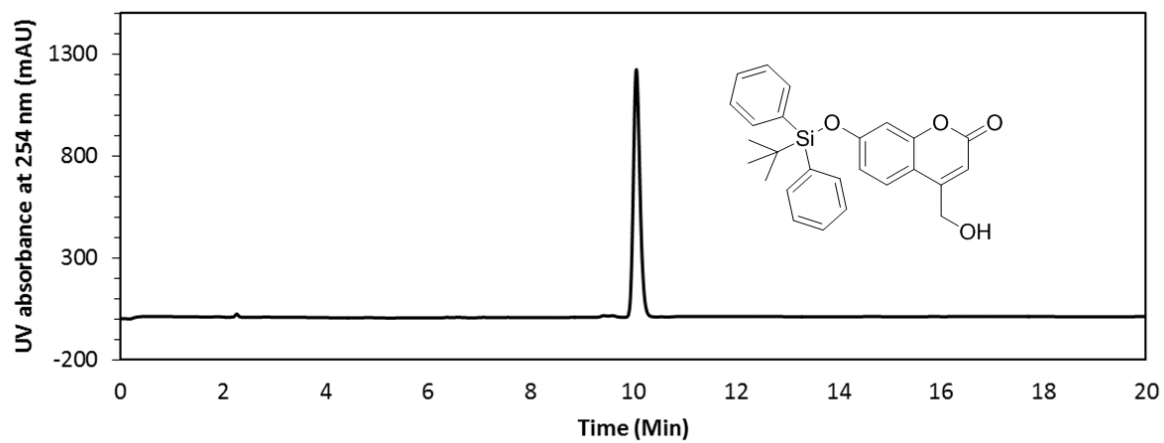

**Figure S18.** UV-HPLC profile of **5**



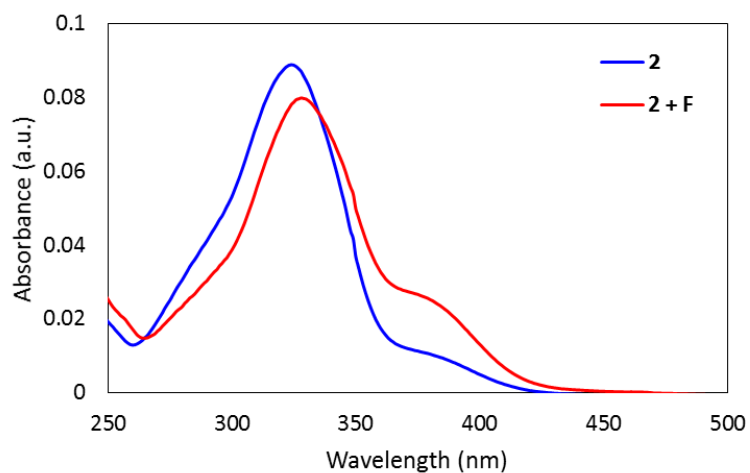

**Figure S19.** Absolute absorption spectra of **2** (7.2 μM) in HEPES buffer pH 7.4 (contain 3% MeCN) before (blue line) and after (red line) incubation with NaF (12.5 mM) for 1 hour

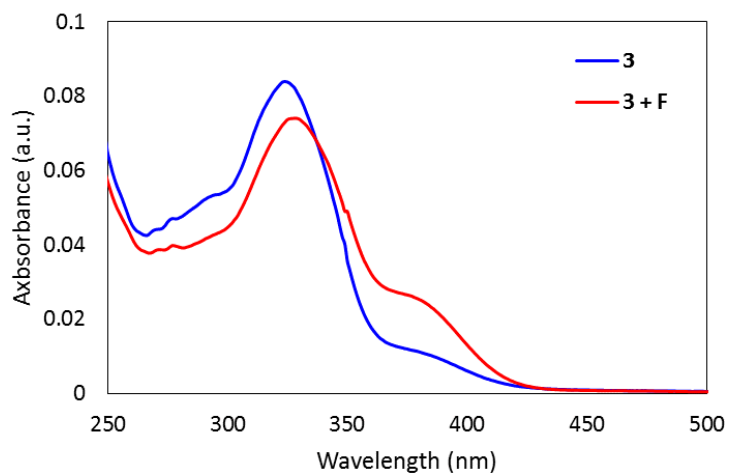

**Figure S20.** Absolute absorption spectra of **3** (7.2 μM) in HEPES buffer pH 7.4 (contain 3% MeCN) before (blue line) and after (red line) incubation with NaF (12.5 mM) for 1 hour

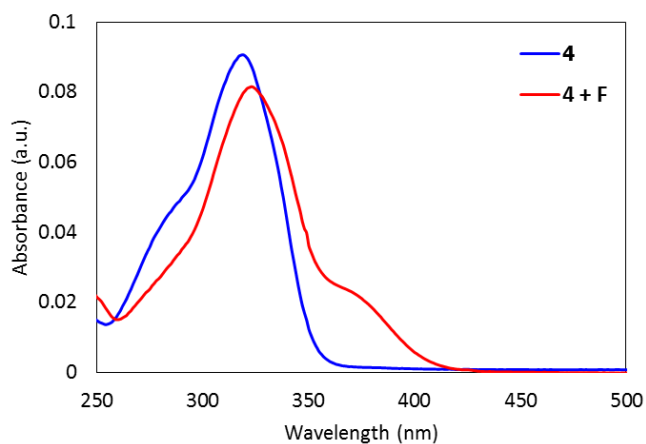

**Figure S21.** Absolute absorption spectra of **4** (7.2  $\mu\text{M}$ ) in HEPES buffer pH 7.4 (contain 3% MeCN) before (blue line) and after (red line) incubation with NaF (12.5 mM) for 1 hour

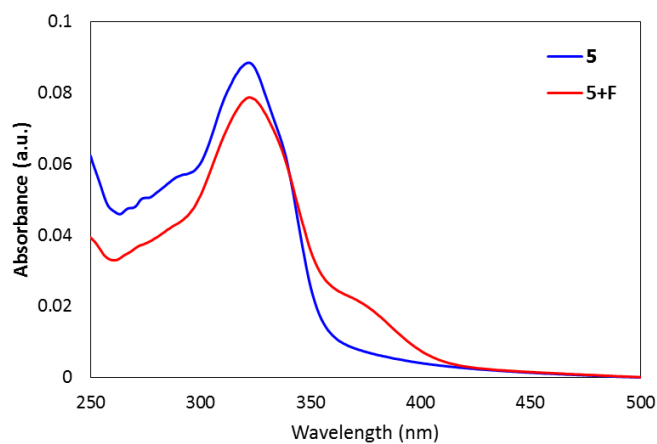

**Figure S22.** Absolute absorption spectra of **5** (7.2  $\mu\text{M}$ ) in HEPES buffer pH 7.4 (contain 3% MeCN) before (blue line) and after (red line) incubation with NaF (12.5 mM) for 1 hour

Kinetic studies of hydrolytic reactions of silyl-capped coumarins (Compound 2, 3, 4, and 5) in HEPES buffer solution pH 7.4 (contain 0.8% MeCN)

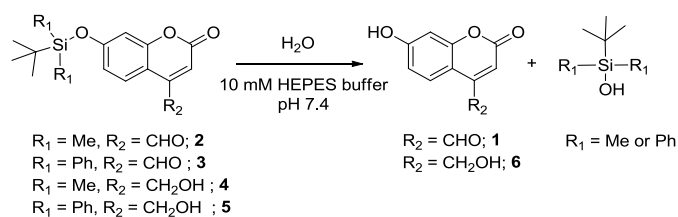

Hydrolytic reaction of silyl-capped coumarin (Coumarin<sub>OSiR<sub>3</sub></sub>)

**First-order rate equation:**  $v = k_{\text{obs}}[\text{Coumarin}_{\text{OSiR}_3}]$

As the fluorescence signals increase upon desilylation, they were used to monitor the ratios of silyl-capped coumarins (Coumarin<sub>OSiR<sub>3</sub></sub>) in HEPES buffer solution (contain 0.8% MeCN). All fluorescence data needed for these kinetic studies are demonstrated in **Figure S23 –S26**

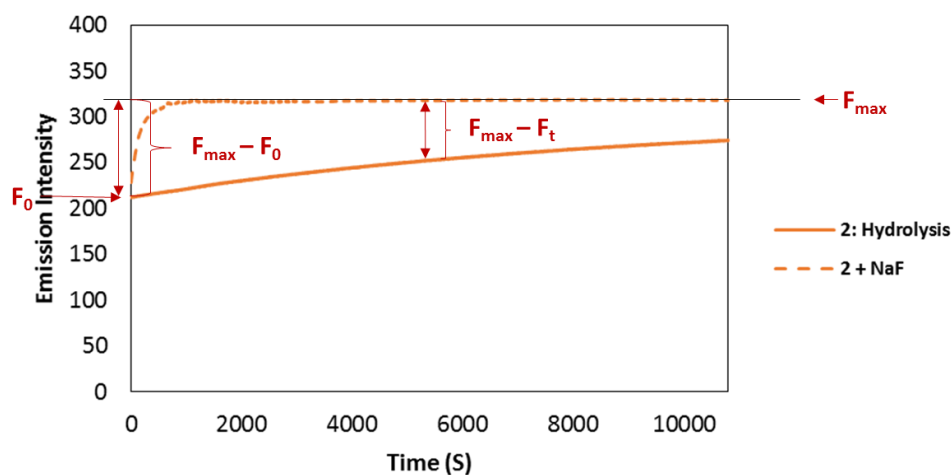

**Figure S23**, Fluorescence signal changes upon dissolving **2** (2  $\mu\text{M}$ ) in HEPES buffer solution pH 7.4 (contain 0.8% MeCN) monitored for 3 hours (Solid line) and the fluorescence signal changes upon addition of excess amount of NaF (1 mM) into the solution of **2** (2  $\mu\text{M}$ ) in HEPES buffer solution pH 7.4 (contain 0.8% MeCN) monitored for 3 h (dashed line).

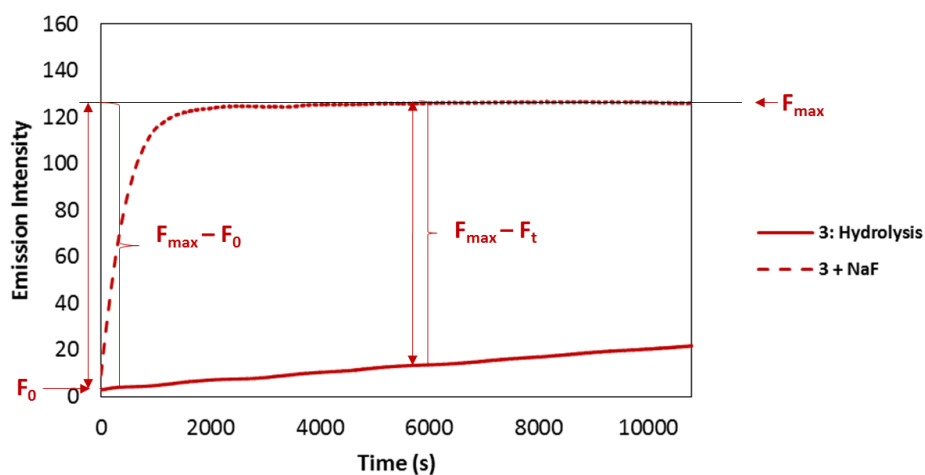

**Figure S24**, Fluorescence signal changes upon dissolving **3** ( $2\ \mu\text{M}$ ) in HEPES buffer solution pH 7.4 (contain 0.8% MeCN) monitored for 3 hours (Solid line) and the fluorescence signal changes upon addition of excess amount of NaF (1 mM) into the solution of **3** ( $2\ \mu\text{M}$ ) in HEPES buffer solution pH 7.4 (contain 0.8% MeCN) monitored for 3 h (dashed line).

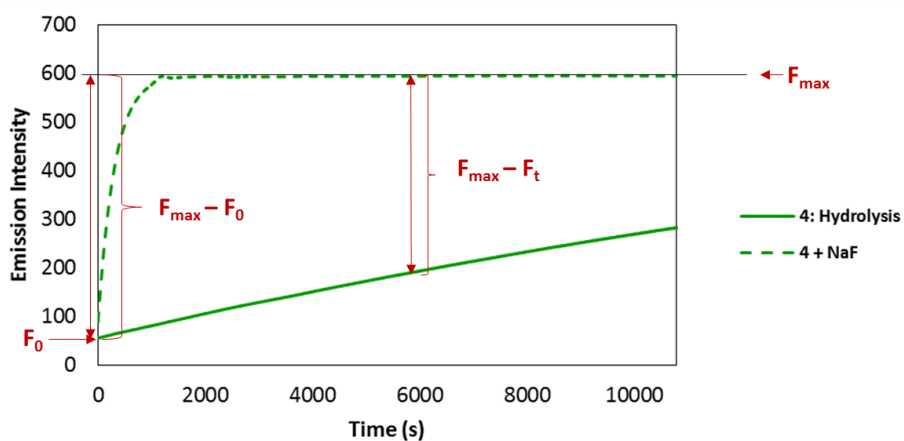

**Figure S25**, Fluorescence signal changes upon dissolving **4** ( $2\ \mu\text{M}$ ) in HEPES buffer solution pH 7.4 (contain 0.8% MeCN) monitored for 3 hours (Solid line) and the fluorescence signal changes upon addition of excess amount of NaF (1 mM) into the solution of **4** ( $2\ \mu\text{M}$ ) in HEPES buffer solution pH 7.4 (contain 0.8% MeCN) monitored for 3 h (dashed line).

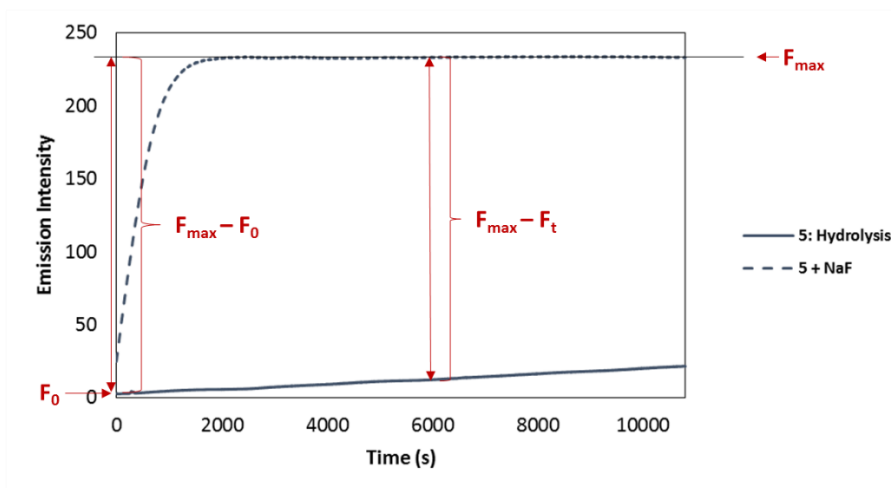

**Figure S26**, Fluorescence signal changes upon dissolving **5** ( $2 \mu\text{M}$ ) in HEPES buffer solution pH 7.4 (contain 0.8% MeCN) monitored for 3 hours (Solid line) and the fluorescence signal changes upon addition of excess amount of NaF (1 mM) into the solution of **5** ( $2 \mu\text{M}$ ) in HEPES buffer solution pH 7.4 (contain 0.8% MeCN) monitored for 3 h (dashed line).

Based on the data in Figure **S23** – **S26**;

$F_{\text{max}} - F_0$  relates to the amount of coumarin\_OSiR<sub>3</sub> at  $t = 0$

$F_{\text{max}} - F_t$  relates to the amount of coumarin\_OSiR<sub>3</sub> at  $t = t$

Where;  $F_{\text{max}}$  = Maximum fluorescence intensity after incubation of coumarin\_OSiR<sub>3</sub> with excess amount of NaF

$F_0$  = Fluorescence intensity upon dissolving coumarin\_OSiR<sub>3</sub> in HEPES buffer solution pH 7.4 (contain 0.8% MeCN) at  $t = 0$

$F_t$  = Fluorescence intensity upon dissolving coumarin\_OSiR<sub>3</sub> in HEPES buffer solution pH 7.4 (contain 0.8% MeCN) at  $t = t$

Therefore; At  $t = 0$ , Ratio of coumarin\_OSiR<sub>3</sub> =  $(F_{\text{max}} - F_0)/(F_{\text{max}} - F_0) = 1 = [\text{coumarin\_OSiR}_3]_0$

At  $t = t$ , Ratio of coumarin\_OSiR<sub>3</sub> =  $(F_{\text{max}} - F_t)/(F_{\text{max}} - F_0) = [\text{coumarin\_OSiR}_3]_t$

These data were fit to the equation  $[\text{Coumarin\_OSiR}_3]_t = [\text{Coumarin\_OSiR}_3]_0 e^{-kt}$ .

All kinetic data are shown in **Table S1** – **S4**.

**Table S1.** Kinetic data for the hydrolysis of **2**.

| Compound <b>2</b> |              |                                                                            |        |                                             |
|-------------------|--------------|----------------------------------------------------------------------------|--------|---------------------------------------------|
| Time (s)          | $F_t$ (a.u.) | Exp. Ratio<br>$(F_{\max} - F_t)/(F_{\max} - F_0)$<br>$F_{\max} = 317$ a.u. | $-\ln$ | Calc. Ratio<br>$e^{(-kt)}$<br>$k = 8.76E-5$ |
| 0                 | 212.58       | 1.000                                                                      | 0.000  | 1.000                                       |
| 500               | 217.16       | 0.956                                                                      | 0.045  | 0.957                                       |
| 1000              | 221.52       | 0.914                                                                      | 0.090  | 0.916                                       |
| 1500              | 226.10       | 0.871                                                                      | 0.139  | 0.877                                       |
| 2000              | 230.08       | 0.832                                                                      | 0.183  | 0.839                                       |
| 2500              | 234.29       | 0.792                                                                      | 0.233  | 0.803                                       |
| 3000              | 237.58       | 0.761                                                                      | 0.274  | 0.769                                       |
| 3500              | 241.44       | 0.724                                                                      | 0.324  | 0.736                                       |
| 4000              | 244.14       | 0.698                                                                      | 0.360  | 0.704                                       |
| 4500              | 247.39       | 0.667                                                                      | 0.405  | 0.674                                       |
| 5000              | 250.34       | 0.638                                                                      | 0.449  | 0.645                                       |
| 5500              | 253.02       | 0.613                                                                      | 0.490  | 0.618                                       |
| 6000              | 255.62       | 0.588                                                                      | 0.531  | 0.591                                       |
| 6500              | 257.93       | 0.566                                                                      | 0.570  | 0.566                                       |
| 7000              | 260.13       | 0.545                                                                      | 0.608  | 0.541                                       |
| 7500              | 262.31       | 0.524                                                                      | 0.647  | 0.518                                       |
| 8000              | 264.94       | 0.499                                                                      | 0.696  | 0.496                                       |
| 8500              | 266.67       | 0.482                                                                      | 0.730  | 0.475                                       |
| 9000              | 268.47       | 0.465                                                                      | 0.766  | 0.454                                       |
| 9500              | 270.12       | 0.449                                                                      | 0.801  | 0.435                                       |
| 10000             | 272.09       | 0.430                                                                      | 0.844  | 0.416                                       |
| 10500             | 274.08       | 0.411                                                                      | 0.889  | 0.398                                       |
| 11000             |              |                                                                            |        | 0.381                                       |
| 11500             |              |                                                                            |        | 0.365                                       |
| 12000             |              |                                                                            |        | 0.349                                       |

**Table S2.** Kinetic data for the hydrolysis of **3**.

| Compound <b>3</b> |              |                                                                            |       |                                             |
|-------------------|--------------|----------------------------------------------------------------------------|-------|---------------------------------------------|
| Time (s)          | $F_t$ (a.u.) | Exp. Ratio<br>$(F_{\max} - F_t)/(F_{\max} - F_0)$<br>$F_{\max} = 126$ a.u. | -ln   | Calc. Ratio<br>$e^{(-kt)}$<br>$k = 1.56E-5$ |
| 0                 | 5.10         | 1.000                                                                      | 0.000 | 1.000                                       |
| 500               | 6.21         | 0.991                                                                      | 0.009 | 0.992                                       |
| 1000              | 6.83         | 0.986                                                                      | 0.014 | 0.984                                       |
| 1500              | 8.15         | 0.975                                                                      | 0.026 | 0.977                                       |
| 2000              | 9.14         | 0.967                                                                      | 0.034 | 0.969                                       |
| 2500              | 9.59         | 0.963                                                                      | 0.038 | 0.962                                       |
| 3000              | 10.13        | 0.958                                                                      | 0.043 | 0.954                                       |
| 3500              | 11.49        | 0.947                                                                      | 0.054 | 0.947                                       |
| 4000              | 12.50        | 0.939                                                                      | 0.063 | 0.939                                       |
| 4500              | 13.10        | 0.934                                                                      | 0.069 | 0.932                                       |
| 5000              | 14.18        | 0.925                                                                      | 0.078 | 0.925                                       |
| 5500              | 15.19        | 0.917                                                                      | 0.087 | 0.918                                       |
| 6000              | 15.64        | 0.913                                                                      | 0.091 | 0.910                                       |
| 6500              | 16.35        | 0.907                                                                      | 0.098 | 0.903                                       |
| 7000              | 17.27        | 0.899                                                                      | 0.106 | 0.896                                       |
| 7500              | 18.27        | 0.891                                                                      | 0.115 | 0.889                                       |
| 8000              | 19.10        | 0.884                                                                      | 0.123 | 0.882                                       |
| 8500              | 20.08        | 0.876                                                                      | 0.132 | 0.876                                       |
| 9000              | 20.88        | 0.869                                                                      | 0.140 | 0.869                                       |
| 9500              | 21.86        | 0.861                                                                      | 0.149 | 0.862                                       |
| 10000             | 22.37        | 0.857                                                                      | 0.154 | 0.855                                       |
| 10500             | 23.30        | 0.849                                                                      | 0.163 | 0.849                                       |
| 11000             |              |                                                                            |       | 0.842                                       |
| 11500             |              |                                                                            |       | 0.835                                       |
| 12000             |              |                                                                            |       | 0.829                                       |

**Table S3.** Kinetic data for the hydrolysis of **4**.

| Compound <b>4</b> |              |                                                                            |        |                                             |
|-------------------|--------------|----------------------------------------------------------------------------|--------|---------------------------------------------|
| Time (s)          | $F_t$ (a.u.) | Exp. Ratio<br>$(F_{\max} - F_t)/(F_{\max} - F_0)$<br>$F_{\max} = 630$ a.u. | $-\ln$ | Calc. Ratio<br>$e^{(-kt)}$<br>$k = 4.58E-5$ |
| 0                 | 55.69        | 1.000                                                                      | 0.000  | 1.000                                       |
| 500               | 68.67        | 0.977                                                                      | 0.023  | 0.977                                       |
| 1000              | 80.84        | 0.956                                                                      | 0.045  | 0.955                                       |
| 1500              | 93.34        | 0.934                                                                      | 0.068  | 0.934                                       |
| 2000              | 105.57       | 0.913                                                                      | 0.091  | 0.913                                       |
| 2500              | 117.91       | 0.892                                                                      | 0.115  | 0.892                                       |
| 3000              | 128.93       | 0.872                                                                      | 0.136  | 0.872                                       |
| 3500              | 139.81       | 0.854                                                                      | 0.158  | 0.852                                       |
| 4000              | 150.82       | 0.834                                                                      | 0.181  | 0.833                                       |
| 4500              | 161.73       | 0.815                                                                      | 0.204  | 0.814                                       |
| 5000              | 172.69       | 0.796                                                                      | 0.228  | 0.795                                       |
| 5500              | 183.18       | 0.778                                                                      | 0.251  | 0.777                                       |
| 6000              | 193.35       | 0.760                                                                      | 0.274  | 0.760                                       |
| 6500              | 203.81       | 0.742                                                                      | 0.298  | 0.743                                       |
| 7000              | 213.17       | 0.726                                                                      | 0.320  | 0.726                                       |
| 7500              | 223.18       | 0.708                                                                      | 0.345  | 0.709                                       |
| 8000              | 233.15       | 0.691                                                                      | 0.370  | 0.693                                       |
| 8500              | 242.39       | 0.675                                                                      | 0.393  | 0.678                                       |
| 9000              | 251.69       | 0.659                                                                      | 0.417  | 0.662                                       |
| 9500              | 260.46       | 0.643                                                                      | 0.441  | 0.647                                       |
| 10000             | 269.68       | 0.627                                                                      | 0.466  | 0.633                                       |
| 10500             | 277.91       | 0.613                                                                      | 0.489  | 0.618                                       |
| 11000             |              |                                                                            |        | 0.604                                       |
| 11500             |              |                                                                            |        | 0.591                                       |
| 12000             |              |                                                                            |        | 0.577                                       |



**Table S4.** Kinetic data for the hydrolysis of **5**.

| Compound 5 |              |                                                                            |        |                                             |
|------------|--------------|----------------------------------------------------------------------------|--------|---------------------------------------------|
| Time (s)   | $F_t$ (a.u.) | Exp. Ratio<br>$(F_{\max} - F_t)/(F_{\max} - F_0)$<br>$F_{\max} = 232$ a.u. | $-\ln$ | Calc. Ratio<br>$e^{(-kt)}$<br>$k = 7.70E-6$ |
| 0          | 6.25         | 1.000                                                                      | 0.000  | 1.000                                       |
| 500        | 7.12         | 0.996                                                                      | 0.004  | 0.996                                       |
| 1000       | 8.31         | 0.991                                                                      | 0.009  | 0.992                                       |
| 1500       | 9.05         | 0.988                                                                      | 0.012  | 0.989                                       |
| 2000       | 9.38         | 0.986                                                                      | 0.014  | 0.985                                       |
| 2500       | 9.79         | 0.984                                                                      | 0.016  | 0.981                                       |
| 3000       | 11.03        | 0.979                                                                      | 0.021  | 0.977                                       |
| 3500       | 11.97        | 0.975                                                                      | 0.026  | 0.973                                       |
| 4000       | 12.76        | 0.971                                                                      | 0.029  | 0.970                                       |
| 4500       | 13.89        | 0.966                                                                      | 0.034  | 0.966                                       |
| 5000       | 14.91        | 0.962                                                                      | 0.039  | 0.962                                       |
| 5500       | 15.32        | 0.960                                                                      | 0.041  | 0.959                                       |
| 6000       | 16.06        | 0.957                                                                      | 0.044  | 0.955                                       |
| 6500       | 17.08        | 0.952                                                                      | 0.049  | 0.951                                       |
| 7000       | 18.12        | 0.947                                                                      | 0.054  | 0.948                                       |
| 7500       | 19.04        | 0.943                                                                      | 0.058  | 0.944                                       |
| 8000       | 20.10        | 0.939                                                                      | 0.063  | 0.940                                       |
| 8500       | 21.15        | 0.934                                                                      | 0.068  | 0.937                                       |
| 9000       | 21.85        | 0.931                                                                      | 0.072  | 0.933                                       |
| 9500       | 22.61        | 0.928                                                                      | 0.075  | 0.930                                       |
| 10000      | 23.58        | 0.923                                                                      | 0.080  | 0.926                                       |
| 10500      | 24.77        | 0.918                                                                      | 0.086  | 0.922                                       |
| 11000      |              |                                                                            |        | 0.919                                       |
| 11500      |              |                                                                            |        | 0.915                                       |
| 12000      |              |                                                                            |        | 0.912                                       |

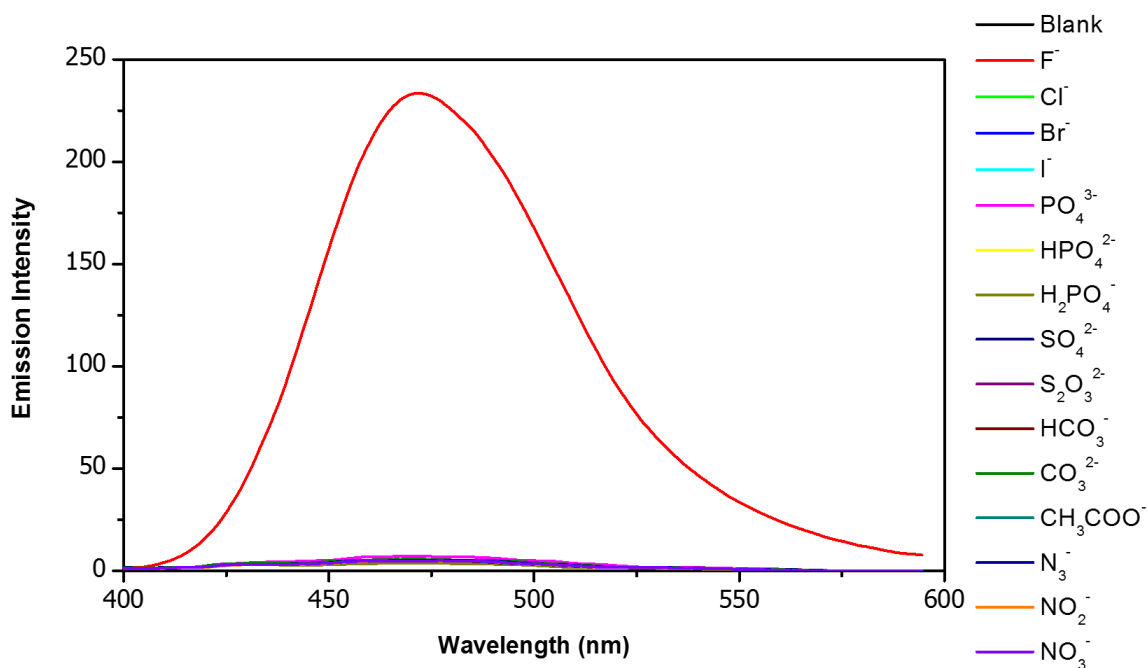

**Figure S27.** The fluorescence spectra of **5** (2  $\mu\text{M}$ ) in the presence of different anions (1 mM) in HEPES buffer solution pH 7.4 (contain 0.8% MeCN).

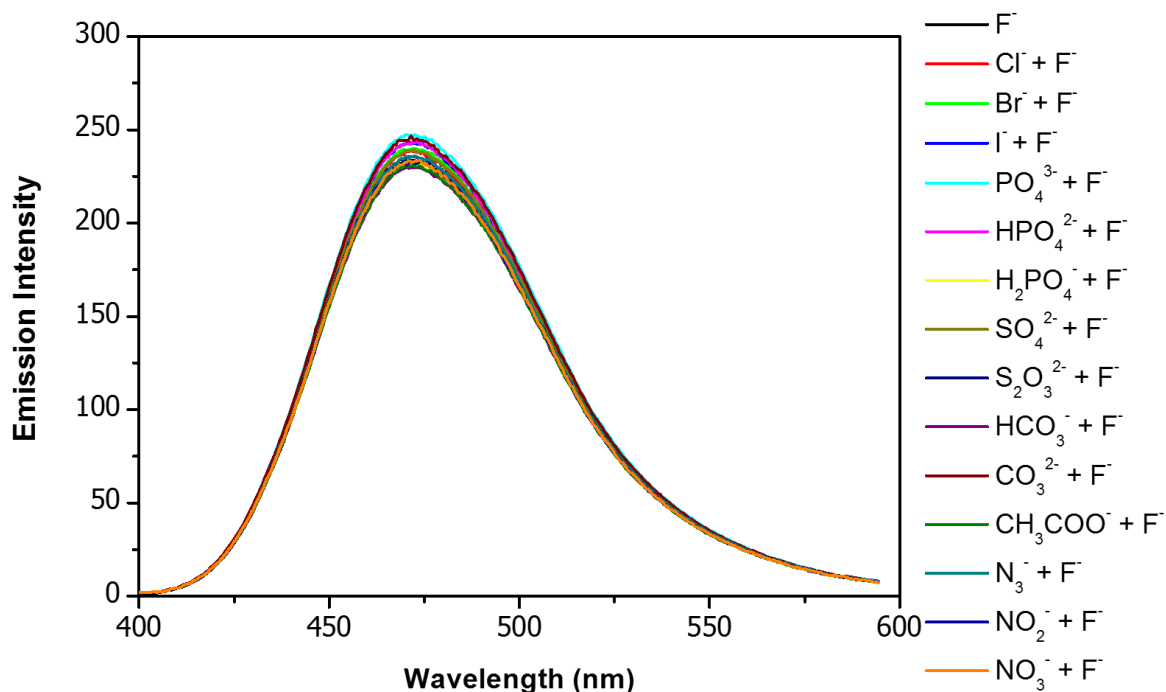

**Figure S28.** The fluorescence spectra of **5** (2  $\mu\text{M}$ ) in the presence of fluoride (1 mM) co-existing with other anions (1 mM) in HEPES buffer solution pH 7.4 (contain 0.8% MeCN).

**The method for determining the limit of detection:**

The calibration curve was obtained from the plot of fluorescence intensity increment ( $F-F_0$ ), as a function of the fluoride concentrations.

**The limit of detection** =  $3 \times \sigma / m$

where  $m$  is the slope of the curve equation, and  $\sigma$  represents the standard deviation for the emission intensity of the probe solution ( $2 \mu\text{M}$ ) in the absence of fluoride anion.

The curve equation (**Figure 8**) was determined as;

$$F-F_0 = 16.024 \times [\text{Fluoride}] + 0.546 \quad (R^2 = 0.999).$$

The emission intensity of the HEPES buffer solution of **5** ( $2 \mu\text{M}$ ) in the absence of fluoride anion =  $4.87 \pm 0.23$  (S.D.)

Therefore, the limit of detection (LOD) =  $(3 \times 0.23)/16.024 = 0.043 \text{ ppm}$  (43 ppb).
